# Supplementary material for: Loss-of-function nuclear factor κB subunit 1 (NFKB1) variants are the most common monogenic cause of common variable immunodeficiency in Europeans
Source: PubMed Central journal article supplement (PMC6148345; doi:10.1016/j.jaci.2018.01.039), 2018-10
Supplement: NIHMS77915-supplement-Supplemental_Data.pdf [file NIHMS77915-supplement-Supplemental_Data.pdf]

## Supplemental Figure Legends

**Figure E1. IGV plot of large *NFKB1* deletion.** IGV plot of patient I:II-1 showing the large *NFKB1* deletion identified by 50% reduction in the number of reads from the whole genome sequencing data mapping to that region.

**Figure E2. Numbers of CVID patients per gene in which we identified a likely pathogenic variant fully explaining the patient's phenotype.** Assessment of all 390 CVID cases in our cohort identified 31 patients with a monogenic defect in 11 different genes. Variants in *NFKB1* contributed to more than half of all CVID patients with a monogenic diagnosis (16/31, 52%). *NKFB2* and *BTK* were the next most commonly implicated genes, with three explained cases each.

**Figure E3. Protein model of high-impact missense variants in and proximal to the ANK domain.** Residues observed with missense variants containing a high CADD score ( $\geq 20$ ) are highlighted. Most of these are situated on the protein exterior (green) and appear equally in the primary immunodeficiency cohort and non-primary immunodeficiency cohorts (**Figure 2**). A623G (#19) appears to be located more interior, although mutation of an Alanine to Glycine is a moderate substitution. Equally notable are residues of the Ankyrin repeats which previously have been probed as interaction sites upon NF- $\kappa$ B dimerization. While R614 (#7), K684 (#8), L517 (#13) and R687 (#16) could be considered part of these putative interaction sites, variants at these sites are found in non-primary immunodeficiency patients (**Figure 2**).

**Figure E4. Western blot analysis of all tested *NFKB1* variant carriers.** Western blot analysis targeting p50, I $\kappa$ B $\alpha$  and GAPDH of *NFKB1* variant carriers. Twelve patients with truncating variants (Arg284\*, His513Glnfs\*28, c.160-1G>A and Asp451\*), one patient with gene deletion (del 103370996-103528207) and three patients with putative protein destabilizing missense variants (Ile281Met, Val98Asp and Ile87Ser) were tested. Relative fluorescence quantification of p50 and GAPDH by Odyssey Infrared Imaging system above and below each western blot. I $\kappa$ B $\alpha$  was not targeted in the Case D western blot.

**Figure E5. Serum IgM, IgG and IgA levels in serum of *NFKB1* LOF variant carrier.** Each dot represents an *NFKB1* LOF variant carrier and their age. In grey age-dependent reference values.

**Figure E6. Gating strategy for Figure 5B-E and additional B cell analyses.** (A) Representative flow cytometry plots of a healthy control, patient A:II-1 (clinically unaffected) and patient A:II-4 (clinically affected). Phenotype of CD19<sup>+</sup>CD20<sup>+</sup> B lymphocytes. Numbers represent percentages in corresponding quadrants. (B) Percentages of CD27<sup>-</sup>IgD<sup>+</sup> (naïve) or CD27<sup>-</sup>IgD<sup>+</sup>CD24<sup>+</sup>CD38<sup>+</sup> (transitional) B cells. (HD healthy donor, *NFKB1*<sup>+/-</sup> individual with *NFKB1* LOF variant.) Only individuals with sufficient B cells could be analyzed. P-values were determined by two-way ANOVA with Bonferroni post-hoc test (naïve B cells) or Student's t-test (transitional B cells), *ns* not significant, \*\**P*≤0.01.

**Figure E7. Gating strategy Figure 6A and 6B and formation of CD38<sup>+</sup> plasmablasts and IgA production.** (A) Representative flow cytometry plots of a healthy control and patient A:II-4 (clinically affected) after a 6 day culture of CFSE-labeled lymphocytes normalized for B cell number unstimulated, CpG/IL-2 (T cell independent activation) and anti-IgM/anti-CD40/IL-21 (T cell dependent activation). B cells gated on CD19<sup>+</sup>CD20<sup>-/+</sup> and subsequently on CD27<sup>++</sup> (left) and CFSE and CD38 (right). Numbers represent percentages in corresponding quadrants. (B) Plasmablast formation measured by proliferation and CD38 upregulation (CFSE<sup>-</sup>CD38<sup>+</sup>). (C) IgA production in the supernatant. (HD healthy donor; CU clinically unaffected or CA clinically affected individuals with LOF variant in *NFKB1*.) Only individuals with sufficient B cells could be analyzed. P-values were determined by two-way ANOVA with Bonferroni post-hoc test, *ns* not significant, \*\**P*≤0.01, \*\*\**P*≤0.001.

**Figure E8. Additional lymphocyte numbers in individuals with *NFKB1* LOF variants.** Absolute numbers of total lymphocytes (CD45<sup>+</sup>), CD4<sup>+</sup> and CD8<sup>+</sup> T cells, NK cells (CD3<sup>-</sup>CD16<sup>+</sup>CD56<sup>+</sup>) and invariant natural killer T cells (CD3<sup>+</sup>Vα24<sup>+</sup>Vβ11<sup>+</sup>). Each dot represents a single individual and their age. In grey age-dependent normal values.

**Figure E9. Normal T cell differentiation in individuals with NF-κB1 deficiency.** (A) Representative flow cytometry dot plots of a healthy control and patient E:II-1, defining the differentiation of CD3<sup>+</sup>CD4<sup>+</sup> and CD3<sup>+</sup>CD8<sup>+</sup> T lymphocytes with CD27 and CD45RA. (B, C) Summary of subsets of (B) CD4<sup>+</sup> T cells and (C) CD8<sup>+</sup> T cells. (HD healthy donor, *NFKB1*<sup>+/-</sup> individual with *NFKB1* LOF variant.) P-values were determined by two-way ANOVA with Bonferroni post-hoc test, *ns* not significant.

**Figure E10. T cells of individuals with *NFKB1* variants (*NFKB1*<sup>+/-</sup>) show normal proliferative capacity.** 6 day culture of CFSE-labeled lymphocytes unstimulated, anti-CD3/anti-CD28 (T cell receptor stimulation) or IL-15. Percentage of CD4<sup>+</sup> or CD8<sup>+</sup> T cell specific cell division as measured by CFSE dilution. (HD healthy donor, *NFKB1*<sup>+/-</sup> individual with *NFKB1* LOF variant.) P-values were determined by two-way ANOVA with Bonferroni post-hoc test, *ns* not significant.

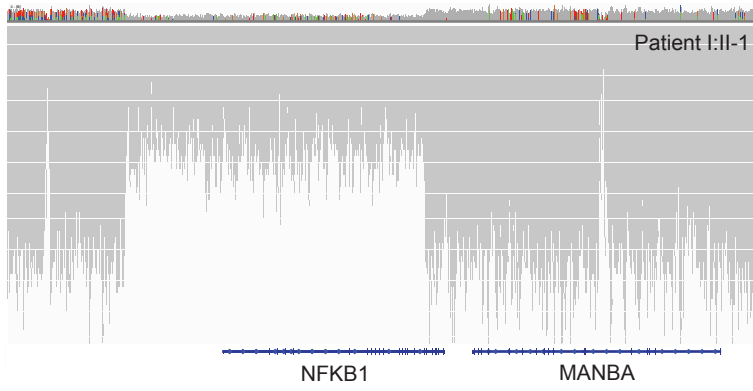

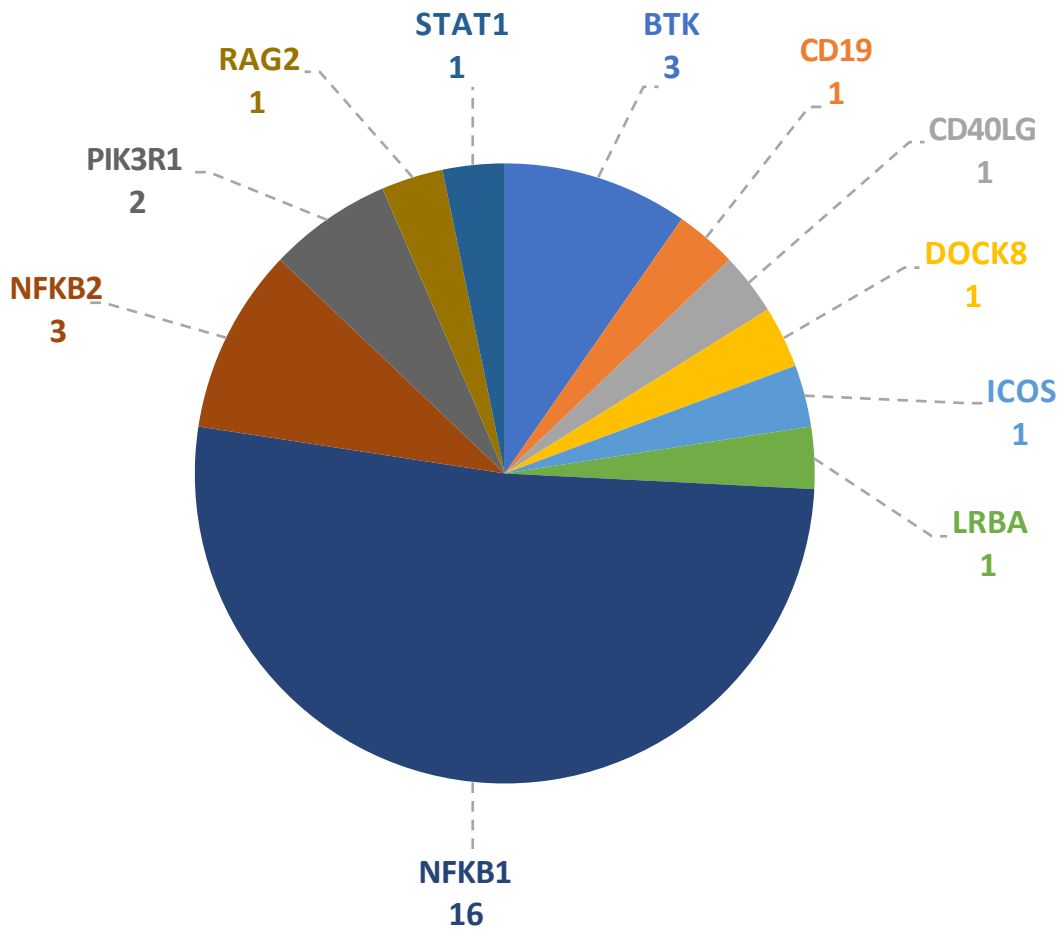

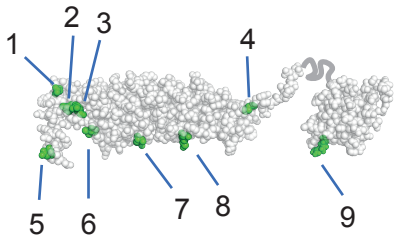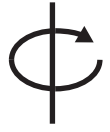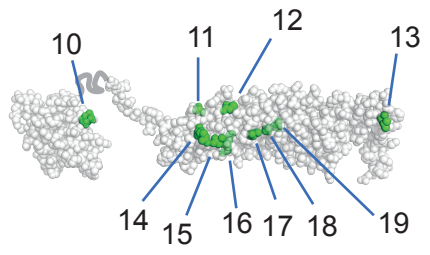

- |           |           |
|-----------|-----------|
| 1. D519N  | 11. A742T |
| 2. V532I  | 12. C704F |
| 3. R534H  | 13. L517V |
| 4. P793R  | 14. R734M |
| 5. N500K  | 15. D697N |
| 6. V539L  | 16. R687H |
| 7. R614G  | 17. S662N |
| 8. K684N  | 18. A624T |
| 9. R850W  | 19. A623G |
| 10. V865I |           |

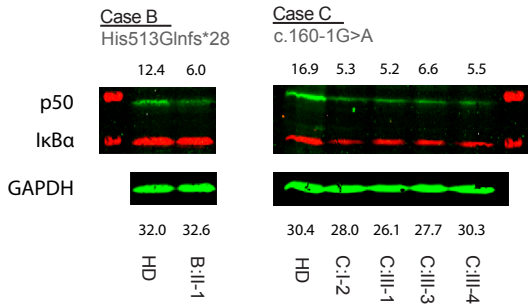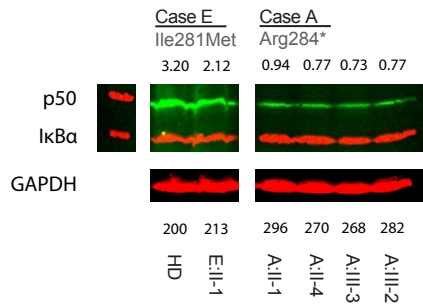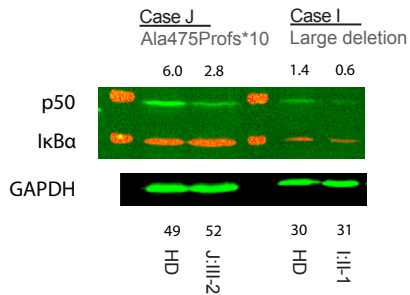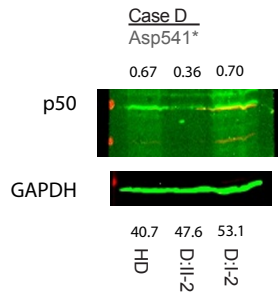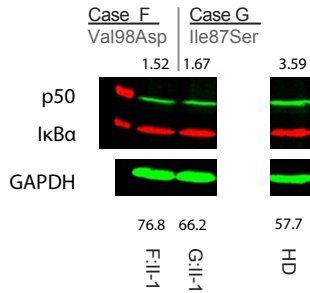

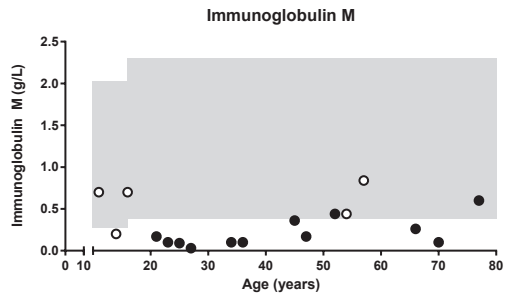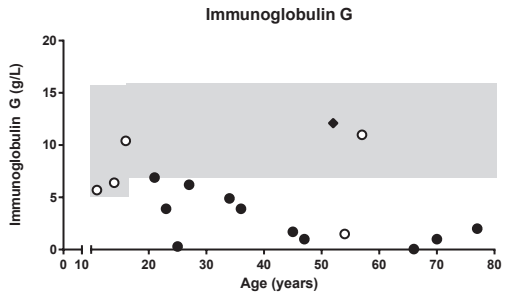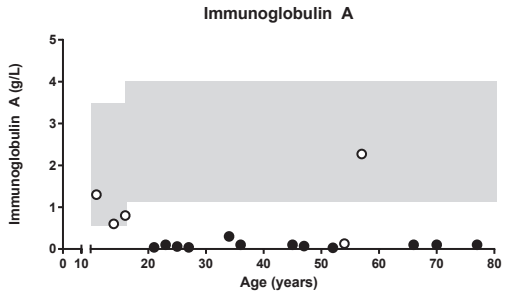

● Clinically affected      ○ Clinically unaffected      ◆ Clinically affected (post IVIG)

A

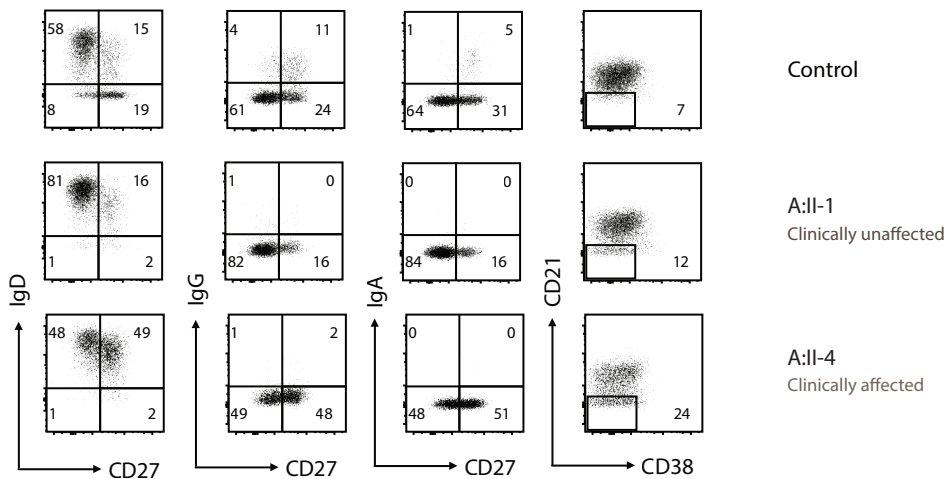

B

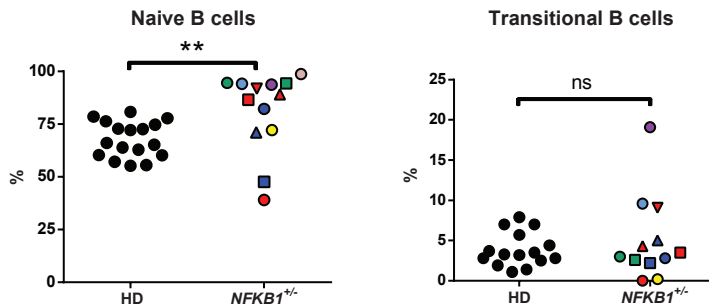

Case A  
Arg284\*

- A:II-1
- A:II-4
- ▲ A:III-2

Case B  
His513Glnfs\*28

- B:II-1

Case C  
c.160-1G>A

- C:I-2
- C:III-1
- ▼ C:III-3
- ▲ C:III-4

Case D  
Asp541\*

- D:I-2
- D:II-2

Case E  
Ile281Met

- E:II-1

Case I  
Large deletion

- I:II-1

Case J  
Ala475Profs\*10

- J:III-2



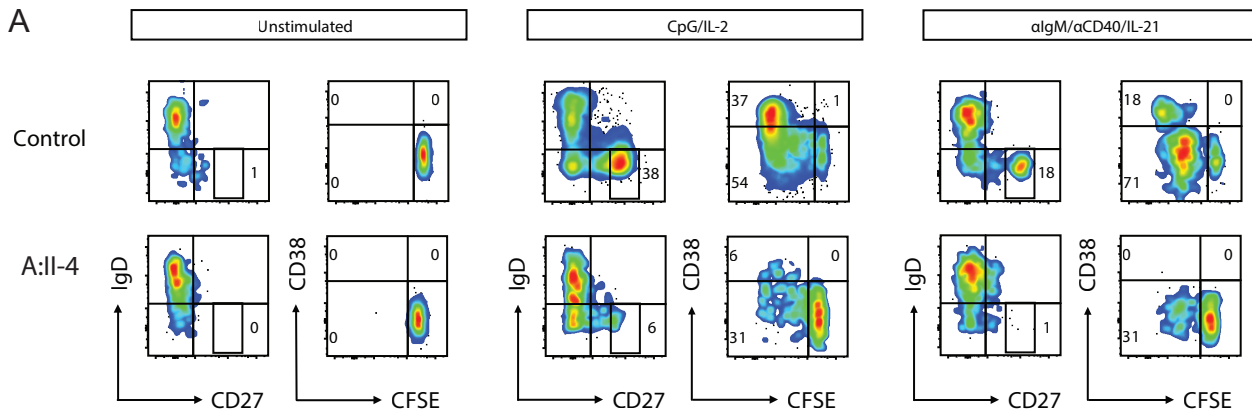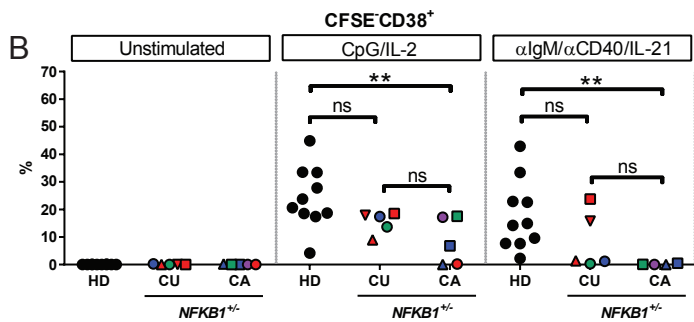

Case A  
Arg284\*  
● A:II-1  
■ A:II-4  
▲ A:III-2

Case B  
His513Glnfs\*28  
● B:II-1

Case C  
c.160-1G>A  
● C:I-2  
■ C:III-1  
▼ C:III-3  
▲ C:III-4

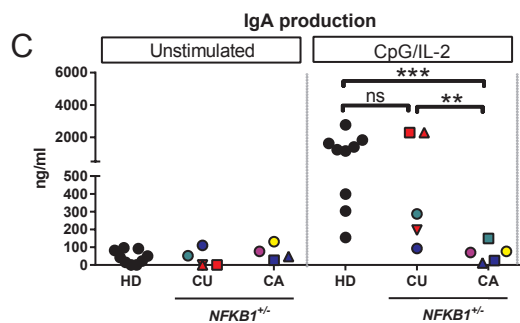

Case D  
Asp541\*  
● D:I-2  
■ D:I-2

Case E  
Ile281Met  
● E:II-1

### Lymphocytes

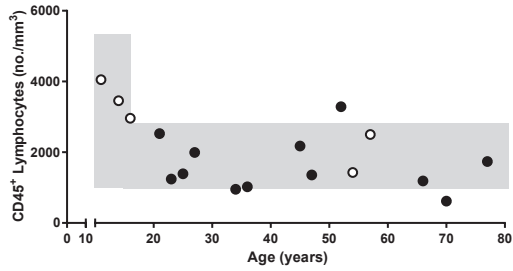

### CD4<sup>+</sup> T cells

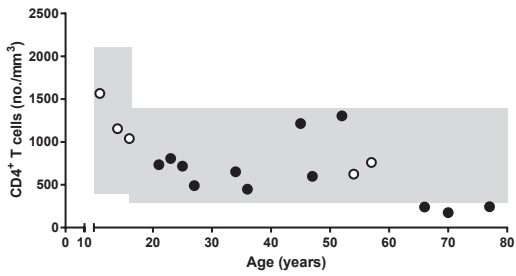

### CD8<sup>+</sup> T cells

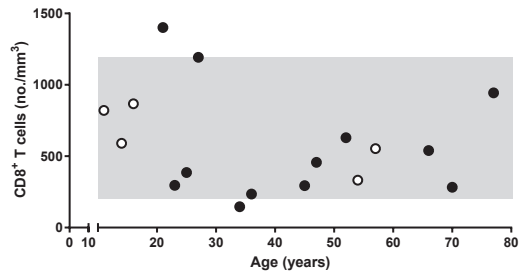

### NK cells

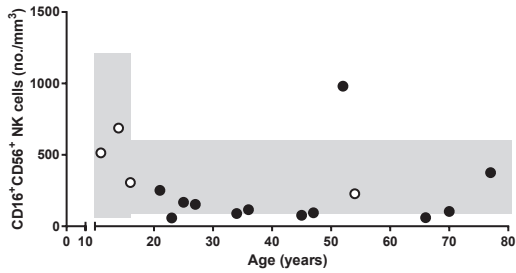

### iNKT cells

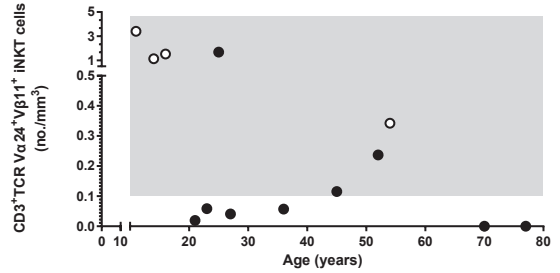

● Clinically affected      ○ Clinically unaffected

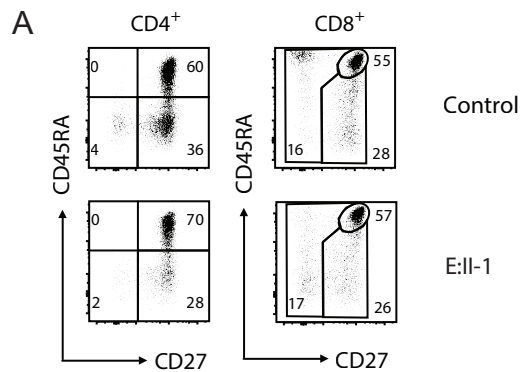

Case A

Arg284\*

- A:II-1
- A:II-4
- ▲ A:III-2
- ◆ A:III-3

Case B

His513Glnfs\*28

- B:II-1

Case C

c.160-1G>A

- C:I-2
- C:III-1
- ▼ C:III-3
- ▲ C:III-4

Case D

Asp541\*

- D:I-2
- D:II-2

Case E

Ile281Met

- E:II-1

Case F

Val98Asp

- F:II-1

Case G

Ile87Ser

- G:II-1

Case I

Large deletion

- I:II-1

Case J

Ala475Profs\*10

- J:III-2

**B**

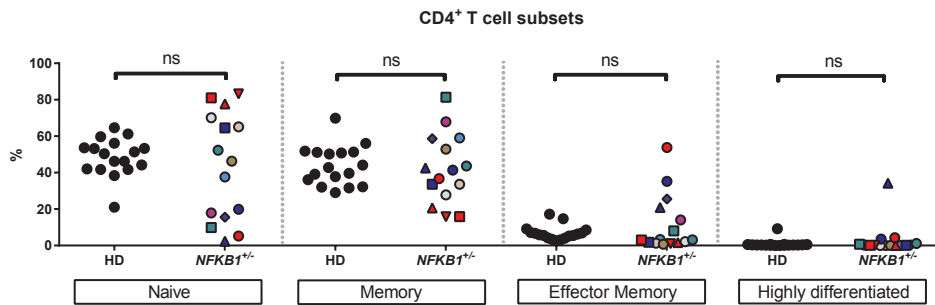

**C**

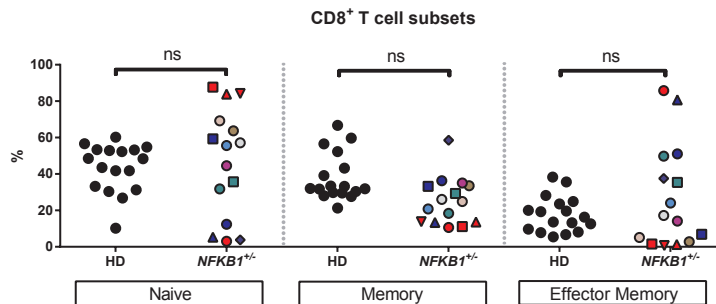

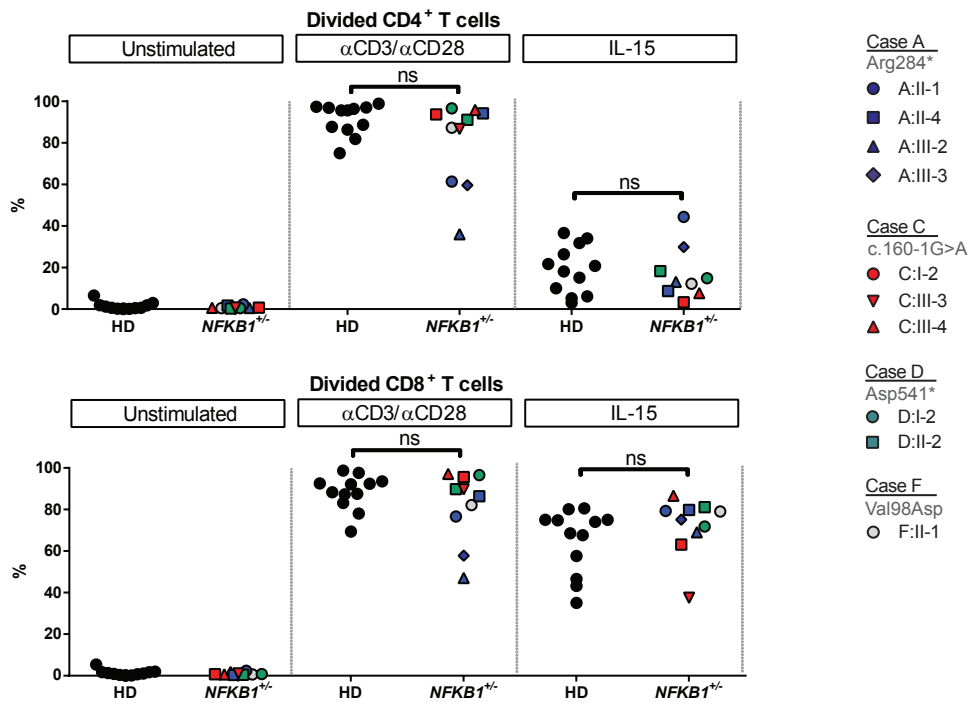

**Table E1. Clinical data of individuals carrying *NFKB1* variants**

| Case ID | Year of birth | Age at PID diagnosis | Clinical diagnosis | Major symptoms at onset                                                     | Infections                                                                                | Autoimmunity / autoinflammation                                   | Malignancy                | Survival                                                            |
|---------|---------------|----------------------|--------------------|-----------------------------------------------------------------------------|-------------------------------------------------------------------------------------------|-------------------------------------------------------------------|---------------------------|---------------------------------------------------------------------|
| Case A  |               |                      |                    |                                                                             |                                                                                           |                                                                   |                           |                                                                     |
| A:II-1  | 1961          | -                    | Healthy            | -                                                                           | -                                                                                         | -                                                                 | -                         | -                                                                   |
| A:II-4  | 1963          | 2015                 | CVID               | Sinusitis 2012<br>Pneumonia 2015                                            | <i>S. pneumoniae</i>                                                                      | -                                                                 | -                         | -                                                                   |
| A:III-2 | 1989          | 1992                 | XLA                | -                                                                           | Frequent sinopulmonary infections                                                         | -                                                                 | -                         | -                                                                   |
| A:III-3 | 1995          | 2005                 | XLA                | Pneumonias 2002                                                             | EBV-related splenomegaly 2005<br>JC-virus 2016                                            | - (splenomegaly)                                                  | -                         | -                                                                   |
| Case B  |               |                      |                    |                                                                             |                                                                                           |                                                                   |                           |                                                                     |
| B:I-1   | 1939          | 1967                 | CVID               | Appendicitis-abscess 1965<br>Bacterial meningitis 1967<br>Pneumonias 1967   | <i>S. pneumoniae</i>                                                                      | AIHA 2005                                                         | B-NHL (EBV-negative) 2007 | Died 2007: heart attack                                             |
| B:II-1  | 1968          | 2011                 | CVID               | Pneumonias 2010                                                             | <i>S. pneumoniae</i> ,<br><i>H. influenzae</i>                                            | Alopecia areata 1988<br>Vitiligo 1989<br>Hypothyroiditis 2003     | -                         | -                                                                   |
| Case C  |               |                      |                    |                                                                             |                                                                                           |                                                                   |                           |                                                                     |
| C:I-2   | 1938          | 1990                 | CVID               | Sinusitis<br>Pneumonias<br>ICU respiratory failure (1978)<br>Bronchiectasis | <i>S. pneumoniae</i> ,<br><i>H. influenzae</i>                                            | Sister and her children have autoimmune disease (MS, IDDM1 & SLE) | Parathyroid adenoma       | -                                                                   |
| C:II-3  | 1972          | 1988                 | CVID               | Pneumonias<br>Bronchiectasis                                                |                                                                                           | IDDM1                                                             |                           | Died in 2008: during 2 <sup>nd</sup> OLT (1 <sup>st</sup> OLT 2005) |
| C:II-5  | 1972          | 1985                 | CVID               | OMAs<br>Oral ulcers<br>Sore throats                                         | <i>H. influenzae</i><br><i>S. pneumoniae</i><br><i>C. albicans</i><br><i>A. fumigatus</i> | -                                                                 | DLBCL (EBV-neg)           | Died in 2011: DLBCL                                                 |
| C:III-1 | 1999          | -                    | Healthy            | -                                                                           | -                                                                                         | -                                                                 | -                         | -                                                                   |
| C:III-3 | 2001          | -                    | Healthy            | -                                                                           | -                                                                                         | -                                                                 | -                         | -                                                                   |
| C:III-4 | 2004          | -                    | Healthy            | -                                                                           | -                                                                                         | -                                                                 | -                         | -                                                                   |
| Case D  |               |                      |                    |                                                                             |                                                                                           |                                                                   |                           |                                                                     |
| D:I-2   | 1958          | -                    | Healthy            | -                                                                           | -                                                                                         | Thyroid disease                                                   | -                         | -                                                                   |
| D:II-2  | 1981          | 1999                 | CVID               | ITP and anemia<br>Hypogammaglobulinemia                                     | Pneumonias<br>Sinusitis                                                                   | ITP<br>Splenomegaly                                               | -                         | -                                                                   |

|         |      |      |      |                                                                                                 |                                                                                                                                 |                                       |                                               |                     |
|---------|------|------|------|-------------------------------------------------------------------------------------------------|---------------------------------------------------------------------------------------------------------------------------------|---------------------------------------|-----------------------------------------------|---------------------|
|         |      |      |      | Asthma                                                                                          | <i>E. coli</i> , urinary tract infections                                                                                       | GLILD<br>Periodontitis                |                                               |                     |
| Case E  |      |      |      |                                                                                                 |                                                                                                                                 |                                       |                                               |                     |
| E:II-1  | 1992 | 1999 | ALPS | Bronchiectasis<br>Hypogammaglobulinemia following multiple courses of Rituximab therapy         | Chest infections<br>Sinusitis                                                                                                   | Autoimmune neutropenia<br>ITP         | -                                             | -                   |
| Case F  |      |      |      |                                                                                                 |                                                                                                                                 |                                       |                                               |                     |
| F:II-1  | 1946 | 2000 | CVID | Severe pneumonias<br>Bronchiectasis<br>Lung fibrosis<br>Cellulitis R leg                        | -                                                                                                                               | Hyperthyroidism                       | Follicular lymphoma (2005); recurrence (2008) | -                   |
| Case G  |      |      |      |                                                                                                 |                                                                                                                                 |                                       |                                               |                     |
| G:II-1  | 1980 | 2001 | CVID | Severe pneumonia<br>Bronchiectasis                                                              | COPD lobectomy (2009)<br><i>M. avium</i>                                                                                        | Mild splenomegaly<br>Chronic diarrhea | -                                             | -                   |
| Case H  |      |      |      |                                                                                                 |                                                                                                                                 |                                       |                                               |                     |
| H:II-1  | 1973 | 1997 | CVID | ITP and AIHA<br>Splenomegaly                                                                    | Pneumonia<br>Sinusitis<br>Invasive CMV                                                                                          | Chronic diarrhea with villous atrophy | -                                             | Died in 2008<br>CMV |
| Case I  |      |      |      |                                                                                                 |                                                                                                                                 |                                       |                                               |                     |
| I:II-1  | 1991 | 2009 | CVID | Multi-dermatomal shingles (age 12)<br>Recurrent pneumonia<br>Bronchiectasis<br>Sinusitis        | <i>S. pneumoniae</i><br><i>H. influenzae</i>                                                                                    | Mild thrombocytopenia                 | -                                             | -                   |
| Case J  |      |      |      |                                                                                                 |                                                                                                                                 |                                       |                                               |                     |
| J:III-2 | 1969 | 2004 | CVID | Recurrent pneumonia<br>Sinusitis, otitis media<br>Recurrent prostatitis                         | <i>M. catarrhalis</i><br><i>H. influenzae</i><br><i>P. aeruginosa</i><br><i>S. pneumoniae</i><br>2011 CMV DNA detected in urine | Diabetes (corticosteroid-induced)     | -                                             | -                   |
| Case K  |      |      |      |                                                                                                 |                                                                                                                                 |                                       |                                               |                     |
| K:II-1  | 1952 | 1996 | CVID | Recurrent pneumonias, otitis and sinusitis<br>Pneumococcal meningitis                           | <i>P. aeruginosa</i><br><i>H. influenzae</i><br><i>S. pneumoniae</i><br><i>S. marcescens</i>                                    | AIHA                                  | Peripheral T-cell lymphoma, received CHOP     | -                   |
| Case L  |      |      |      |                                                                                                 |                                                                                                                                 |                                       |                                               |                     |
| L:II-1  | 1969 | 1991 | CVID | Initially few symptoms – tested for IgG levels when her brother died of bacterial meningitis on |                                                                                                                                 | AIHA 1999 (splenectomy)               | -                                             | -                   |

|        |      |      |      |                                                                                                                            |                                                                                                                                                                                                                                                             |                                                                                                                        |               |   |
|--------|------|------|------|----------------------------------------------------------------------------------------------------------------------------|-------------------------------------------------------------------------------------------------------------------------------------------------------------------------------------------------------------------------------------------------------------|------------------------------------------------------------------------------------------------------------------------|---------------|---|
|        |      |      |      | background recurrent respiratory infections and low Ig's. Respiratory infections soon became apparent.                     |                                                                                                                                                                                                                                                             |                                                                                                                        |               |   |
| Case M |      |      |      |                                                                                                                            |                                                                                                                                                                                                                                                             |                                                                                                                        |               |   |
| M:II-1 | 1985 | 2012 | CVID | Respiratory infections, with bronchiectasis and chronic sinusitis.<br>Chronic diarrhea                                     | <i>P. aeruginosa</i> (bronchi/sinuses-2012,3,4,5,6),<br><i>S. aureus</i> 2015,6, RSV 2015, atypical mycobacterium infection 2009, <i>C. difficile</i> - year unknown, plantar warts (HPV), ongoing Herpes Zoster, disseminated 2011 (while on azathioprine) | Evans syndrome 2009 (Rituximab)<br>Autoimmune enteropathy 2010<br>Vitamin B12 deficiency (suspected pernicious anemia) | -             | - |
| Case N |      |      |      |                                                                                                                            |                                                                                                                                                                                                                                                             |                                                                                                                        |               |   |
| N:II-1 | 1959 | 2015 | CVID | Hypogammaglobulinemia.<br>Generalised lymphadenopathy and splenomegaly<br>Pancytopenia                                     | EBV, CMV<br>Neutropenic sepsis (without positive cultures)                                                                                                                                                                                                  | Alopecia totalis                                                                                                       | Breast cancer |   |
| Case O |      |      |      |                                                                                                                            |                                                                                                                                                                                                                                                             |                                                                                                                        |               |   |
| O:II-1 | 1978 | 2001 | CVID | Frequent bacterial infections<br>Chronic diarrhea                                                                          | <i>Giardia lamblia</i>                                                                                                                                                                                                                                      | -                                                                                                                      | -             | - |
| Case P |      |      |      |                                                                                                                            |                                                                                                                                                                                                                                                             |                                                                                                                        |               |   |
| P:II-1 | 1961 | 2004 | CVID | AIHA (treated with Rituximab 2012).<br>ITP and autoimmune neutropenia.<br>Recurrent sinus and respiratory tract infections | Chronic Norovirus<br>Rhinovirus<br><i>H. influenzae</i><br><i>S. pneumoniae</i>                                                                                                                                                                             | GLILD.<br>Polyarthritis (RA-like: RF/ANA negative)                                                                     | -             | - |

**Note:**

*H. influenzae* strains are non-typeable (= uncapsulated) unless mentioned specifically.

**Abbreviations:**

AIHA: Autoimmune haemolytic anaemia; B-NHL: B non-Hodgkin lymphoma; CVID: Common variable immunodeficiency; DLBCL: Diffuse Large B cell lymphoma; GLILD: Granulomatous-lymphocytic inflammatory lung disease; ITP: immune thrombocytopenia; OLT: Orthopic liver transplantation; XLA: X-linked agammaglobulinemia

**Table E2. Symptoms and organ involvement in individuals carrying *NFKB1* variants**

| Case ID | Year of birth | Lung                            | Lymph nodes                                | Spleen                                             | Liver function                                                                  | Gastro-intestinal tract                                                            | Brain  |
|---------|---------------|---------------------------------|--------------------------------------------|----------------------------------------------------|---------------------------------------------------------------------------------|------------------------------------------------------------------------------------|--------|
| Case A  |               |                                 |                                            |                                                    |                                                                                 |                                                                                    |        |
| A:II-1  | 1961          | -                               | -                                          | -                                                  | -                                                                               | -                                                                                  | -      |
| A:II-4  | 1963          | -                               | -                                          | -                                                  | -                                                                               | -                                                                                  | -      |
| A:III-2 | 1989          | -                               | -                                          | -                                                  | -                                                                               | -                                                                                  | -      |
| A:III-3 | 1995          | -                               | Enlarged                                   | Splenectomy for splenomegaly, suspected malignancy | Transaminitis                                                                   | -                                                                                  | -      |
| Case B  |               |                                 |                                            |                                                    |                                                                                 |                                                                                    |        |
| B:I-1   | 1939          | -                               | -                                          | Splenomegaly                                       | Hepatomegaly                                                                    | -                                                                                  | -      |
| B:II-1  | 1968          | -                               | -                                          | -                                                  | -                                                                               | -                                                                                  | -      |
| Case C  |               |                                 |                                            |                                                    |                                                                                 |                                                                                    |        |
| C:I-2   | 1938          | Bronchiectasis<br>Lung fibrosis | -                                          | -                                                  | Transaminitis                                                                   | -                                                                                  | -      |
| C:II-3  | 1972          | Bronchiectasis                  | Enlarged (cervical and axillary)           | Enlarged                                           | Liver fibrosis (1998) without granulomas, no signs of infection or autoimmunity | -                                                                                  | -      |
| C:II-5  | 1972          | Bronchiectasis                  | -                                          | -                                                  | Liver cirrhosis (1996), suspect of hepatitis C virus infection                  | Duodenal partial villous blunting, no granuloma and absence of colonic plasmacells | Tremor |
| C:III-1 | 1999          | -                               | -                                          | -                                                  | -                                                                               | -                                                                                  | -      |
| C:III-3 | 2001          | -                               | -                                          | -                                                  | -                                                                               | -                                                                                  | -      |
| C:III-4 | 2004          | -                               | -                                          | -                                                  | -                                                                               | -                                                                                  | -      |
| Case D  |               |                                 |                                            |                                                    |                                                                                 |                                                                                    |        |
| D:I-2   | 1958          | -                               | -                                          | -                                                  | -                                                                               | -                                                                                  | -      |
| D:II-2  | 1981          | GLILD                           | -                                          | Splenomegaly                                       | Normal                                                                          | -                                                                                  | -      |
| Case E  |               |                                 |                                            |                                                    |                                                                                 |                                                                                    |        |
| E:II-1  | 1992          | Bronchiectasis                  | Enlarged as a child; biopsies unremarkable | Splenomegaly (previous ITP)                        | Normal                                                                          | -                                                                                  | -      |
| Case F  |               |                                 |                                            |                                                    |                                                                                 |                                                                                    |        |
| F:II-1  | 1946          | Bronchiectasis, fibrosis        | -                                          | -                                                  | -                                                                               | -                                                                                  | -      |
| Case G  |               |                                 |                                            |                                                    |                                                                                 |                                                                                    |        |
| G:II-1  | 1980          | Bronchiectasis, fibrosis        | -                                          | -                                                  | -                                                                               | -                                                                                  | -      |
| Case H  |               |                                 |                                            |                                                    |                                                                                 |                                                                                    |        |



|         |      |                                                                    |                                                      |                                           |                                                |                                                                              |               |
|---------|------|--------------------------------------------------------------------|------------------------------------------------------|-------------------------------------------|------------------------------------------------|------------------------------------------------------------------------------|---------------|
| H:II-1  | 1973 | -                                                                  | -                                                    | Splenomegaly                              | -                                              | Chronic diarrhea with villous atrophy                                        | CMV retinitis |
| Case I  |      |                                                                    |                                                      |                                           |                                                |                                                                              |               |
| I:II-1  | 1991 | Bronchiectasis                                                     | Enlarged (mediastinal)                               | Splenomegaly                              | Mild elevation transaminases, gamma-GT         | -                                                                            | -             |
| Case J  |      |                                                                    |                                                      |                                           |                                                |                                                                              |               |
| J:III-2 | 1969 | Bronchiectasis (2005)<br>Asthma                                    | -                                                    | -                                         | Normal                                         | Intermittent diarrhoea and abdominal pain                                    | -             |
| Case K  |      |                                                                    |                                                      |                                           |                                                |                                                                              |               |
| K:II-1  | 1952 | Bronchiectasis (2009)                                              | Previous peripheral T cell lymphoma: CD3+CD8+ (2015) | Splenomegaly (previous AIHA)              | -                                              | -                                                                            | -             |
| Case L  |      |                                                                    |                                                      |                                           |                                                |                                                                              |               |
| L:II-1  | 1969 | Chronic left lower lobe collapse, COPD (smoker), no bronchiectasis | -                                                    | Splenectomy (AIHA)                        | Normal                                         | -                                                                            | -             |
| Case M  |      |                                                                    |                                                      |                                           |                                                |                                                                              |               |
| M:II-1  | 1985 | Bronchiectasis. No interstitial disease. Nodule top left lung      | -                                                    | 'Mild' splenomegaly on CT only            | Normal                                         | Autoimmune enteropathy (2011)                                                | -             |
| Case N  |      |                                                                    |                                                      |                                           |                                                |                                                                              |               |
| N:II-1  | 1959 | NAD                                                                | Generalised Lymphadenopathy                          | Large splenomegaly                        | Normal                                         | -                                                                            | -             |
| Case O  |      |                                                                    |                                                      |                                           |                                                |                                                                              |               |
| O:II-1  | 1978 | NAD                                                                | -                                                    | -                                         | Normal                                         | -                                                                            | -             |
| Case P  |      |                                                                    |                                                      |                                           |                                                |                                                                              |               |
| P:II-1  | 1961 | GLILD bronchiectasis                                               | -                                                    | Splenomegaly (2012), normalized over time | Nodular regenerative hyperplasia of the liver. | Chronic diarrhea: upon biopsies absence of plasmacells (Norovirus-positive). | -             |

**Abbreviations:**

AIHA: Autoimmune haemolytic anaemia; GLILD: Granulomatous-lymphocytic inflammatory lung disease; ITP: immune thrombocytopenia; NAD: No active disease

**Table E3. Immunological findings in individuals carrying *NFKB1* variants**

| Case ID | Year of birth | Absolute lymphocyte count | Abs # CD3+ T cells | Abs # CD3/CD4+ T cells | Abs # CD3/CD8+ T cells | Abs # CD16/56+ NK cells | Abs # CD19+ B cells | IgA level (g/L) | IgG level (g/L) - prior to Ig subst. | IgM level (g/L) | ANA, other autoAbs |
|---------|---------------|---------------------------|--------------------|------------------------|------------------------|-------------------------|---------------------|-----------------|--------------------------------------|-----------------|--------------------|
| Case A  |               |                           |                    |                        |                        |                         |                     |                 |                                      |                 |                    |
| A:II-1  | 1961          | 1.427                     | 0.978 (68.5%)      | 0.624 (43.7%)          | 0.332 (23.3%)          | 0.228 (16.0%)           | 0.215 (15.0%)       | 0.13            | 1.5                                  | 0.44            | ANA neg            |
| A:II-4  | 1963          | 3.288                     | 1.974 (60.0%)      | 1.305 (39.7%)          | 0.630 (19.2%)          | 0.981 (29.9%)           | 0.323 (9.8%)        | 0.03            | 12.1 (post IVIG)                     | 0.44            | ANA neg            |
| A:III-2 | 1989          | 1.630                     | 1.400 (85.9%)      | 0.403 (24.7%)          | 0.941 (57.8%)          | 0.153 (9.4%)            | 0.074 (4.5%)        | <0.04           | 6.9                                  | 0.17            | ANA neg            |
| A:III-3 | 1995          | 2.527                     | 2.269 (89.8%)      | 0.735 (29.1%)          | 1.401 (55.5%)          | 0.252 (10.0%)           | 0 (<0.50%)          | <0.04           | 6.2                                  | <0.03           | ANA neg            |
| Case B  |               |                           |                    |                        |                        |                         |                     |                 |                                      |                 |                    |
| B:I-1   | 1939          | 1.189                     | 0.820 (69.0%)      | 0.240 (20.0%)          | 0.540 (44.0%)          | 0.060 (5.0%)            | 0.290 (25.0%)       | <0.1            | <0.05                                | 0.26            | Coomb's pos        |
| B:II-1  | 1968          | 1.936                     | 1.551 (80.1%)      | 1.257 (64.9%)          | 0.284 (14.7%)          | 0.077 (4.0%)            | 0.291 (15.01%)      | 0.1             | 1.7                                  | 0.36            | Anti-TPO pos       |
| Case C  |               |                           |                    |                        |                        |                         |                     |                 |                                      |                 |                    |
| C:I-2   | 1938          | 1.741                     | 1.316 (75.6%)      | 0.243 (14.0%)          | 0.943 (54.2%)          | 0.375 (21.5%)           | 0.047 (2.7%)        | <0.1            | 2.0                                  | 0.6             | -                  |
| C:II-3  | 1972          | 0.950                     | 0.870 (91.6%)      | 0.450 (47.4%)          | 0.410 (43.2%)          | 0.060 (6.3%)            | 0.020 (2.1%)        | <0.1            | 1.5                                  | 0.20            | IDDM1              |
| C:II-5  | 1972          | 1.150                     | 0.980 (85.2%)      | 0.650 (56.5%)          | 0.331 (28.8%)          | 0.100 (8.7%)            | 0.042 (3.7%)        | <0.1            | 1.4                                  | 0.20            | -                  |
| C:III-1 | 1999          | 2.959                     | 2.027 (68.5%)      | 1.038 (35.1%)          | 0.867 (29.3%)          | 0.306 (10.3%)           | 0.597 (20.2%)       | 0.8             | 10.4                                 | 0.7             | -                  |
| C:III-3 | 2001          | 3.458                     | 1.919 (55.5%)      | 1.156 (33.4%)          | 0.591 (17.1%)          | 0.687 (19.9%)           | 0.749 (21.7%)       | 0.6             | 6.4 (low IgG2)                       | 0.2             | -                  |
| C:III-4 | 2004          | 4.054                     | 2.615 (64.5%)      | 1.565 (38.6%)          | 0.821 (20.3%)          | 0.514 (12.7%)           | 0.883 (21.8%)       | 1.3             | 5.7 (low IgG2 and IgG3)              | 0.7             | -                  |
| Case D  |               |                           |                    |                        |                        |                         |                     |                 |                                      |                 |                    |
| D:I-2   | 1958          | 2.5                       | 1.373 (54.9%)      | 0.761 (30.4%)          | 0.553 (22.1%)          | NA                      | 0.173 (6.9%)        | 2.3             | 11.0                                 | 0.84            | -                  |
| D:II-2  | 1981          | 1.200                     | 0.679 (55.6%)      | 0.504 (42.0%)          | 0.140 (11.7%)          | NA                      | 0.027 (2.2%)        | <0.3            | 4.9                                  | <0.1            | -                  |
| Case E  |               |                           |                    |                        |                        |                         |                     |                 |                                      |                 |                    |

|         |      |                        |                  |                  |                  |                 |                  |       |                           |       |                         |
|---------|------|------------------------|------------------|------------------|------------------|-----------------|------------------|-------|---------------------------|-------|-------------------------|
| E:II-1  | 1992 | 1.046                  | 0.963<br>(92.1%) | 0.709<br>(67.8%) | 0.203<br>(19.4%) | NA              | 0.022<br>(2.1%)  | <0.1  | 3.9                       | <0.1  | -                       |
| Case F  |      |                        |                  |                  |                  |                 |                  |       |                           |       |                         |
| F:II-1  | 1946 | 0.619                  | 0.458<br>(74.0%) | 0.174<br>(28.1%) | 0.283<br>(45.7%) | NA              | 0                | <0.1  | <2                        | <0.1  | -                       |
| Case G  |      |                        |                  |                  |                  |                 |                  |       |                           |       |                         |
| G:II-1  | 1980 | 1.022                  | 0.684<br>(66.9%) | 0.449<br>(43.9%) | 0.235<br>(23.0%) | NA              | 0                | <0.1  | <3.9                      | <0.1  | -                       |
| Case H  |      |                        |                  |                  |                  |                 |                  |       |                           |       |                         |
| H:II-1  | 1973 | 5.458<br>(splenectomy) | 4.857<br>(89%)   | 2.129<br>(39%)   | 2.620<br>(48%)   | 0.262<br>(4.8%) | 0.132<br>(3%)    | 0.02  | 0.1                       | 0.03  | Coomb's pos<br>ANA pos  |
| Case I  |      |                        |                  |                  |                  |                 |                  |       |                           |       |                         |
| I:II-1  | 1991 | 1.4                    | 1.102<br>(78%)   | 0.717<br>(51%)   | 0.349<br>(25%)   | 0.166<br>(12%)  | 0.122<br>(7%)    | <0.06 | 0.3                       | 0.09  | -                       |
| Case J  |      |                        |                  |                  |                  |                 |                  |       |                           |       |                         |
| J:III-2 | 1969 | 1.7                    | 1.336<br>(78.6%) | 0.706<br>(41.5%) | 0.602<br>(35.4%) | 0.019<br>(1.1%) | 0.318<br>(18.7%) | <0.07 | <1.0                      | 0.17  | -                       |
| Case K  |      |                        |                  |                  |                  |                 |                  |       |                           |       |                         |
| K:II-1  | 1952 | 0.7                    | 0.639<br>(97%)   | 0.206<br>(31%)   | 0.388<br>(59%)   | 0.005<br>(1%)   | 0.015<br>(2%)    | 0.05  | <0.1                      | <0.1  | Coomb's pos             |
| Case L  |      |                        |                  |                  |                  |                 |                  |       |                           |       |                         |
| L:II-1  | 1969 | 1.4                    | 1.129<br>(77%)   | 0.687<br>(47%)   | 0.405<br>(28%)   | 0.249<br>(17%)  | 0.080<br>(5%)    | <0.05 | 10.3<br>(post SCIG)       | <0.05 | Coomb's pos             |
| Case M  |      |                        |                  |                  |                  |                 |                  |       |                           |       |                         |
| M:II-1  | 1985 | 1.0                    | 0.902<br>(90%)   | 0.621<br>(62%)   | 0.223<br>(22%)   | 0.055<br>(5.5%) | 0.028<br>(2.8%)  | <0.04 | Low pre Ig<br>replacement | 0.65  | Coomb's pos,<br>ANA neg |
| Case N  |      |                        |                  |                  |                  |                 |                  |       |                           |       |                         |
| N:II-1  | 1959 | 1.012                  | 0.82<br>(81%)    | 0.54<br>(53%)    | 0.26<br>(28%)    | 0.15<br>(16%)   | 0.02<br>(2%)     | <0.07 | 2.3                       | 0.18  | ANA neg                 |
| Case O  |      |                        |                  |                  |                  |                 |                  |       |                           |       |                         |
| O:II-1  | 1978 | 1.7                    | 1.39<br>(82%)    | 0.97<br>(57%)    | 0.40<br>(24%)    | 0.06<br>(3.5%)  | 0.24<br>(14%)    | 0.4   | 4.6                       | 0.3   | ANA neg                 |
| Case P  |      |                        |                  |                  |                  |                 |                  |       |                           |       |                         |
| P:II-1  | 1961 | 0.79                   | 0.52<br>(66%)    | 0.33<br>(42%)    | 0.18<br>(23%)    | 0.11<br>(14%)   | 0.15<br>(19%)    | <0.1  | 1.9                       | 0.1   | Coomb's pos<br>ANA neg  |

**Abbreviations:**

NA: Not Available

## Supplemental Methods

### Immunophenotyping

Peripheral blood mononuclear cells (PBMCs) were isolated using standard density gradient centrifugation techniques using Lymphoprep (Nycomed, Oslo, Norway). Absolute numbers of lymphocytes, T cells, B cells and NK cells were determined with Multitest six-color reagents (BD Biosciences, San Jose, USA), according to manufacturer's instructions. For the immunophenotyping the PBMCs were resuspended in PBS, containing 0.5% (w/v) BSA and 0.01% sodium azide and incubated with saturating concentrations of fluorescently labeled conjugated monoclonal antibodies. Analysis of cells was performed using a FACSCanto-II flowcytometer and FlowJo software. Patient samples were analyzed simultaneously with PBMCs from healthy controls. The following directly conjugated monoclonal antibodies were used: CD4 PE-Cy7 [348809], CD8 PerCP-Cy5.5 [341050], CD20 PerCP-Cy5.5 [332781], CD21 FITC [561372], CD27 APC [337169], CD38 PE-Cy7 [335825], CD45 APC-Cy7 [348815], IgD PE [555779], and TCR $\gamma\delta$  FITC [347903] from BD (San Jose, USA), CD3 Alexa 700 [56-0038-41], CD19 Alexa 700 [56-0199-42] and CD27 APC-eFluor 780 [47-0279-42] from eBioscience (San Diego, USA), CD24 FITC [M1605] and CD27 FITC [M1764] from Sanquin (Amsterdam, the Netherlands), CD45RA (2H4-RD1) PE [6603181], TCR $\alpha\beta$  PE [PN A39499], TCR V $\alpha$ 24 FITC [PM IM1589] and TCR V $\beta$ 11 PE [PN IM2290] from Beckman Coulter (Brea, USA), IgM FITC [F0317] and IgG FITC [F0158] from Dako (Glostrup, Denmark), IgA FITC [130-093-071] from Miltenyi Biotec (Bergisch Gladbach, Germany).

### B and T cell functional assay

To analyze the *ex vivo* activation of T and B cells, PBMCs were resuspended in PBS at a concentration of  $5-10 \times 10^6$  cells/ml and labeled with 0.5 $\mu$ M CFSE (Molecular Probes) in PBS for 10 minutes at 37°C under constant agitation. Cells were washed and subsequently resuspended in Iscove's Modified Dulbecco's medium (IMDM) supplemented with 10% fetal calf serum (BioWhittaker), antibiotics, and  $3.57 \times 10^{-7}$

<sup>4</sup>%(v/v) β-mercaptoethanol (Merck). Labeled PBMCs containing a fixed number of  $2 \times 10^4$  (96-well plate) or  $10 \times 10^4$  B cells (48-well plate) per well in a flat-bottom plate for 6 days at 37°C and stimulated with saturating amounts of anti-IgM mAb (clone MH15; Sanquin), anti-CD40 mAb (clone 14G7; Sanquin) and 20ng/ml IL-21 (Invitrogen), or 1μg/ml CpG oligodeoxynucleotide 2006 (Invivogen) and 100U/ml IL-2 (R&D Systems), or anti-CD3 (clone 1xE) and anti-CD28 (clone 15E8), or IL-15 (R&D Systems). Proliferation of B and T cells was assessed by measuring CFSE dilution in combination with the same mAbs used for immunophenotyping and analyzed using a FACSCanto-II flowcytometer and FlowJo software.
